# Supplementary material
Source: ML conference proceedings conference paper supplement (https://openaccess.thecvf.com/content/CVPR2025/html/Kim_RefPose_Leveraging_Reference_CVPR_2025_paper.html)
Supplement: Supplementary file 1 [file Kim_RefPose_Leveraging_Reference_CVPR_2025_supplemental.pdf]

# RefPose: Leveraging Reference Geometric Correspondences for Accurate 6D Pose Estimation of Unseen Objects

## Supplementary Material

This Supplementary Material provides the following extended analyses, experimental findings, and additional details that complement our main paper:

- Additional training details, including dataset specifications, training duration, and memory requirements.
- A detailed description of the relative pose estimator used in our framework.
- Additional qualitative results demonstrating the effectiveness of our method across various datasets.

### 1. Additional Training Details

The training process consists of three stages: optical flow fine-tuning, a coarse stage, and a refinement stage. All stages were trained using image pairs constructed from the GSO [1] dataset. As noted in MegaPose [3], GSO plays a significant role in performance. We observed that training exclusively with GSO resulted in only a minor performance difference (-0.2 AR), despite requiring less training effort. The entire training process takes approximately 80 GPU hours on an RTX 3090, with a memory consumption of around 20GB.

### 2. Details of Relative Pose Estimator

The relative pose estimator follows the MRPE [4] framework and is composed of a three-layer CNN, two fully connected (FC) layers, and two separate FC branches for translation and rotation estimation. This network outputs a 3D translation vector and a 6D rotation vector [6].

### 3. Additional Qualitative Results

We present additional visualizations of the proposed method. Fig. 1 and Fig. 2 illustrate the coarse pose estimation results for the YCB-V [5] and LM-O [2] datasets, respectively, while Fig. 3 and Fig. 4 depict the corresponding pose refinement results. Although the coarse pose estimation stage yields promising results, a comparison between the last columns of Fig. 1 and Fig. 2 with those of Fig. 3 and Fig. 4 demonstrates that the refinement method proposed in this paper further improves pose estimation accuracy.

## References

- [1] Laura Downs, Anthony Francis, Nate Koenig, Brandon Kinman, Ryan Hickman, Krista Reymann, Thomas B McHugh, and Vincent Vanhoucke. Google scanned objects: A high-quality dataset of 3d scanned household items. In *2022 International Conference on Robotics and Automation (ICRA)*, pages 2553–2560. IEEE, 2022.
- [2] Alexander Krull, Eric Brachmann, Frank Michel, Michael Ying Yang, Stefan Gumhold, and Carsten Rother. Learning analysis-by-synthesis for 6d pose estimation in rgb-d images. In *Proceedings of the IEEE international conference on computer vision*, pages 954–962, 2015.
- [3] Yann Labbé, Lucas Manuelli, Arsalan Mousavian, Stephen Tyree, Stan Birchfield, Jonathan Tremblay, Justin Carpentier, Mathieu Aubry, Dieter Fox, and Josef Sivic. Megapose: 6d pose estimation of novel objects via render & compare. *arXiv preprint arXiv:2212.06870*, 2022.
- [4] Jaewoo Park, Jaeguk Kim, and Nam Ik Cho. Leveraging positional encoding for robust multi-reference-based object 6d pose estimation. *arXiv preprint arXiv:2401.16284*, 2024.
- [5] Yu Xiang, Tanner Schmidt, Venkatraman Narayanan, and Dieter Fox. Posecnn: A convolutional neural network for 6d object pose estimation in cluttered scenes. *arXiv preprint arXiv:1711.00199*, 2017.
- [6] Yi Zhou, Connelly Barnes, Jingwan Lu, Jimei Yang, and Hao Li. On the continuity of rotation representations in neural networks. In *Proceedings of the IEEE/CVF conference on computer vision and pattern recognition*, pages 5745–5753, 2019.

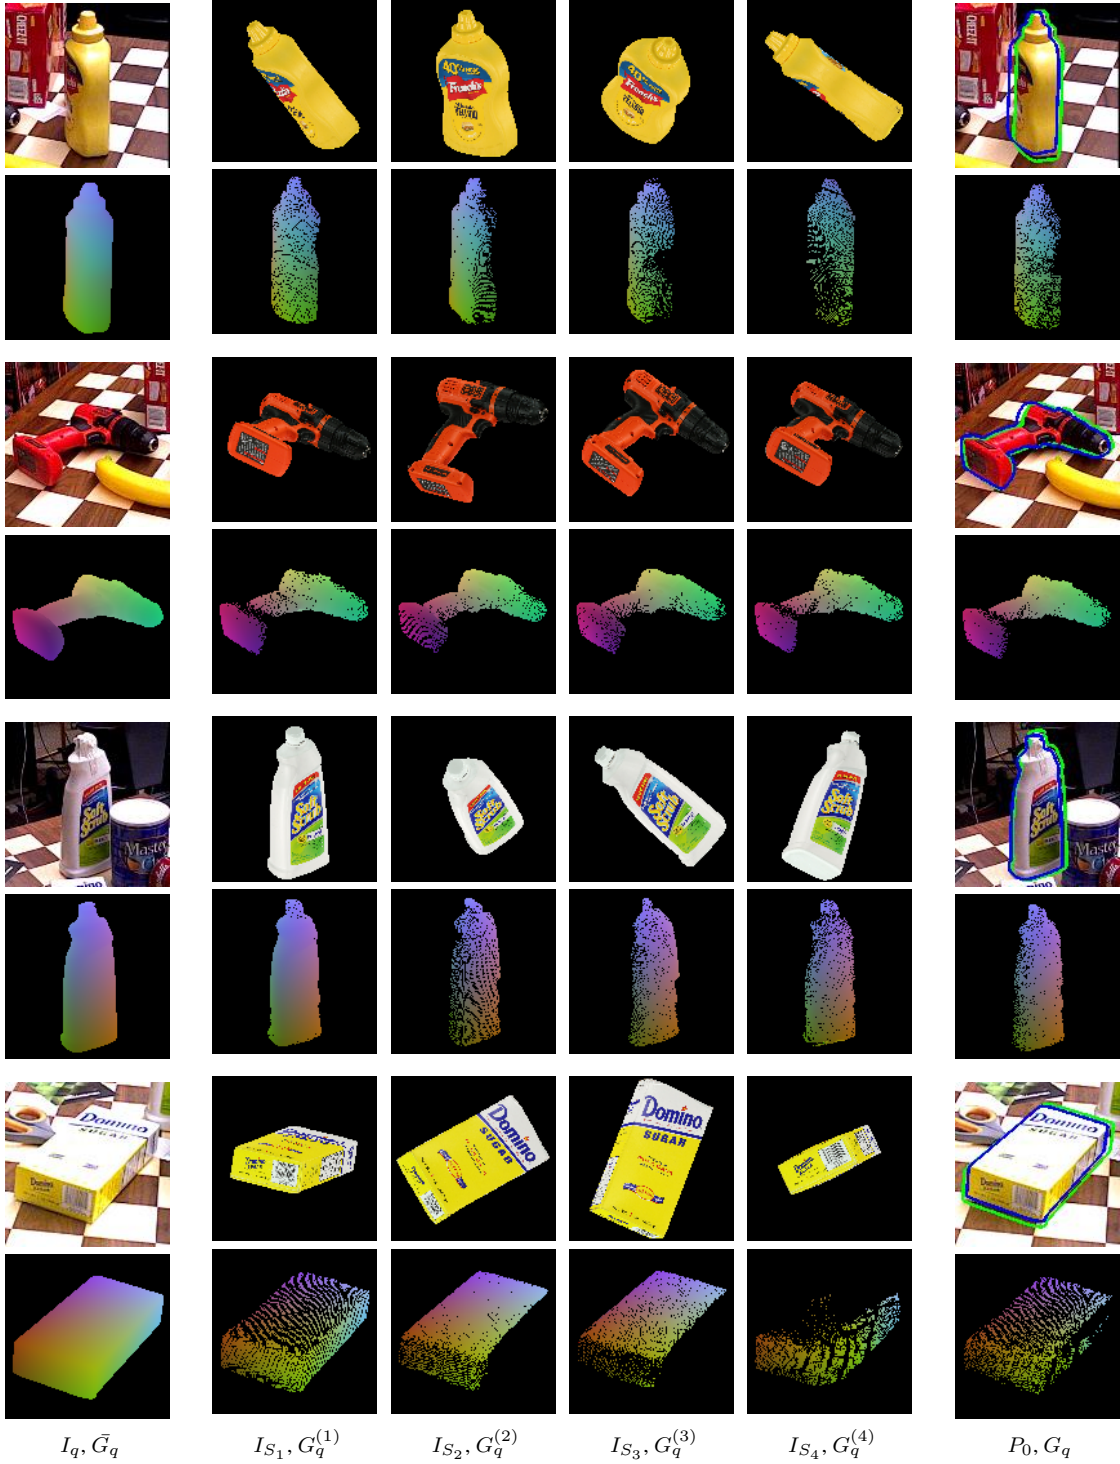

Figure 1. Qualitative results of coarse pose estimation on YCB-V. The first column shows the query image  $I_q$  along with the ground truth query geometry  $\bar{G}_q$ . The second to fifth columns display each template image  $I_{S_k}$  from the selected template set  $\mathcal{S}$  along with the corresponding estimated geometry candidate  $G_q^{(k)}$ . In the last column, the image at the bottom illustrates the geometry  $G_q$  estimated through pixel-wise voting, and the image at the top shows the estimated initial pose  $P_0$ . In the top image, the green contour represents the ground truth pose, while the blue contour represents the estimated pose.

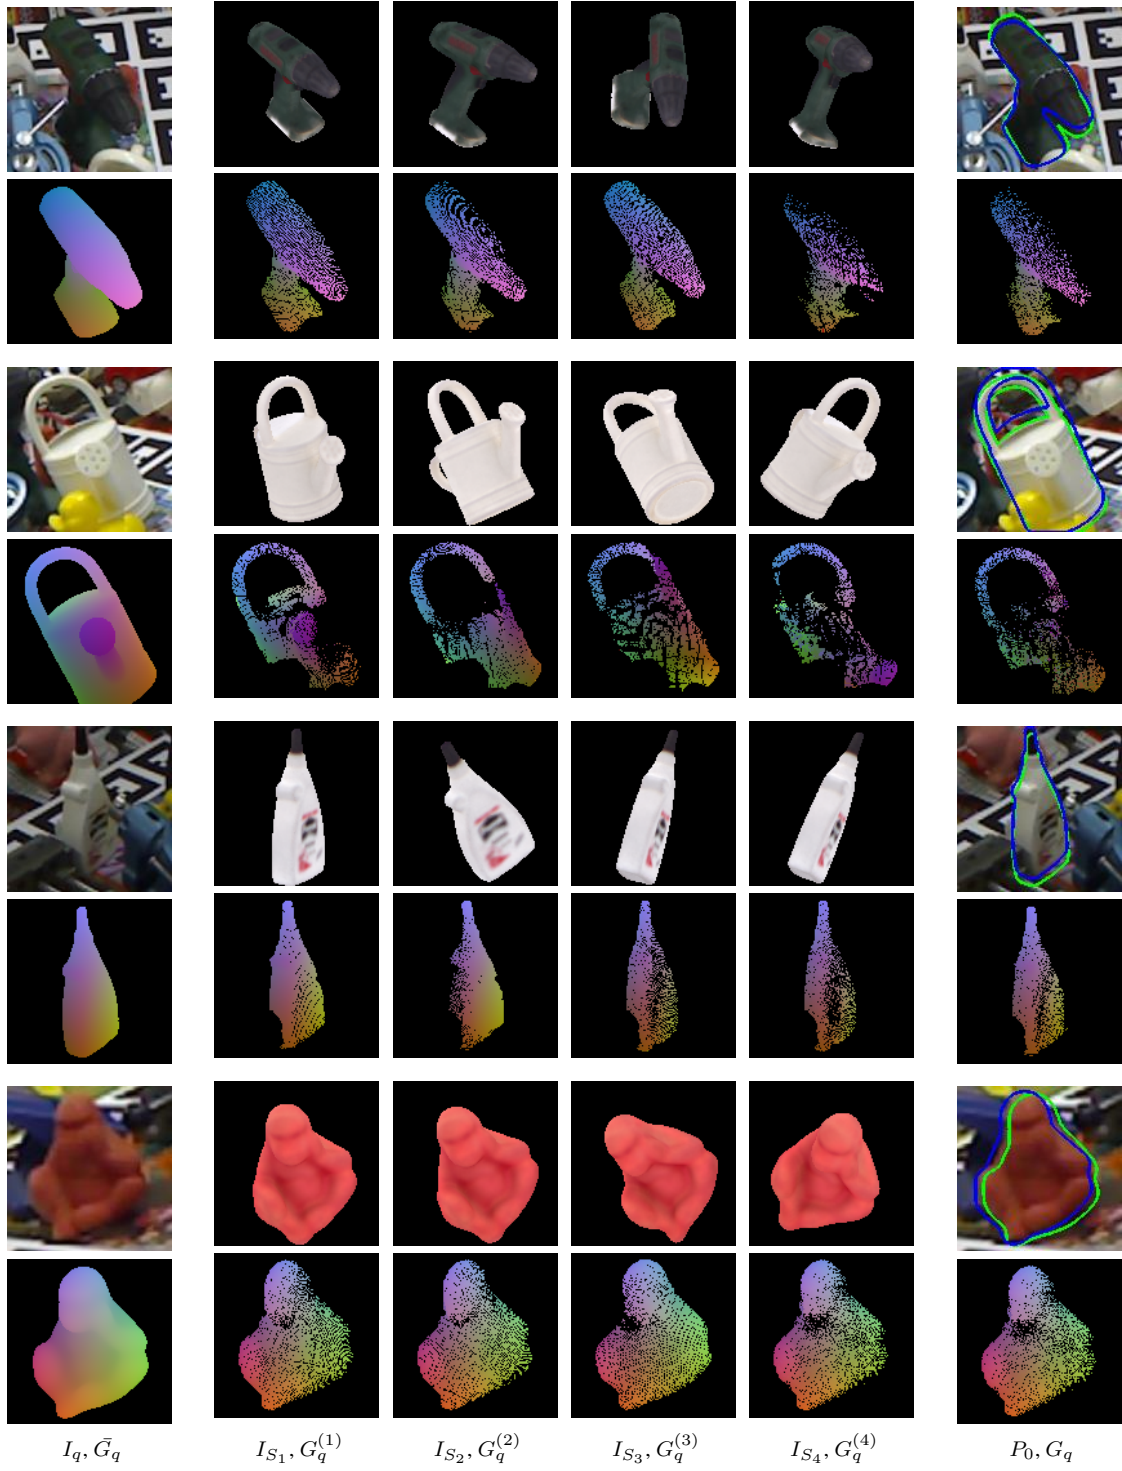

Figure 2. Qualitative results of coarse pose estimation on LM-O.

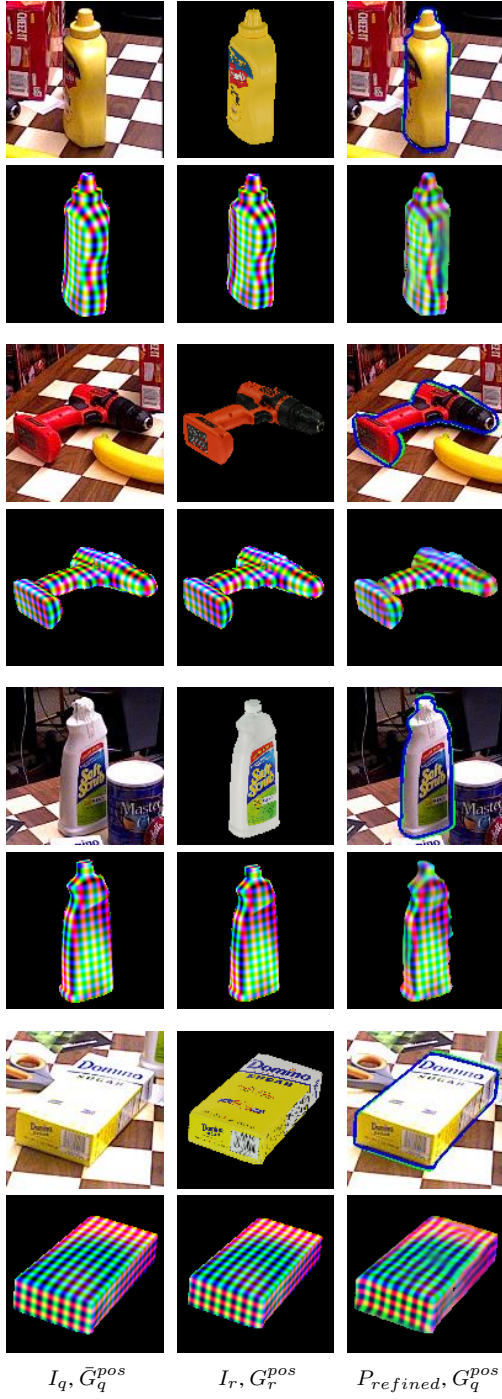

Figure 3. Qualitative results of pose refinement on YCB-V. The first column shows the query image  $I_q$  along with the ground truth query geometry  $\bar{G}_q^{pos}$ . The second column displays the reference image  $I_r$  and the reference geometry  $G_r^{pos}$ . In the last column, the image at the bottom illustrates the estimated geometry  $G_q^{pos}$ , and the image at the top shows the refined pose  $P_{refined}$ . We visualize  $G^{pos}$  for the low-frequency 3 channels.

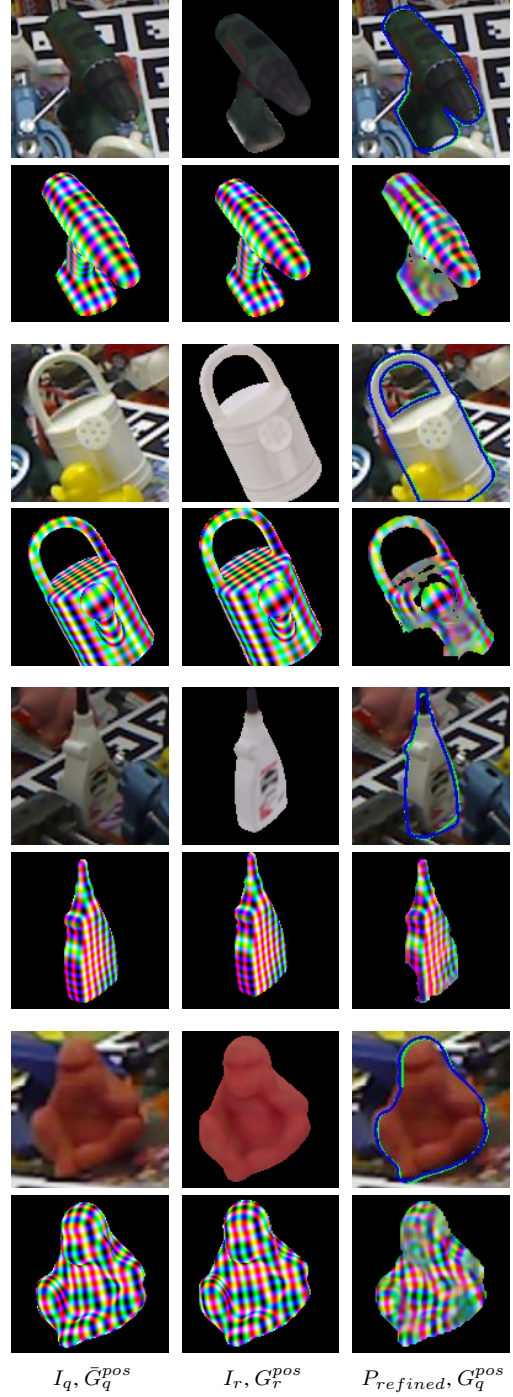

Figure 4. Qualitative results of pose refinement on LM-O.
